1 **Cold exposure drives weight gain and adiposity following chronic suppression**  
2 **of brown adipose tissue**

3 Peter Aldiss<sup>1\*</sup>, Jo E Lewis<sup>3</sup>, Irene Lupini<sup>4</sup>, Ian Bloor<sup>1</sup>, Ramyar Chavoshinejad<sup>1</sup>, David  
4 Boocock<sup>5</sup>, Amanda K Miles<sup>5</sup>, Francis J P Ebling<sup>3</sup>, Helen Budge<sup>1</sup> and Michael E Symonds<sup>1,2\*</sup>.

5

6 <sup>1</sup> *The Early Life Research Unit, Division of Child Health, Obstetrics and Gynaecology,*  
7 *School of Medicine, University of Nottingham; [peter.aldiss@nottingham.ac.uk](mailto:peter.aldiss@nottingham.ac.uk);*

8 *[helen.budge@nottingham.ac.uk](mailto:helen.budge@nottingham.ac.uk); [michael.symonds@nottingham.ac.uk](mailto:michael.symonds@nottingham.ac.uk);*

9 *[ian.bloor@nottingham.ac.uk](mailto:ian.bloor@nottingham.ac.uk); [ramyar.chavoshinejad@nottingham.ac.uk](mailto:ramyar.chavoshinejad@nottingham.ac.uk)*

10 <sup>2</sup> *Nottingham Digestive Disease Centre and Biomedical Research Unit, School of*  
11 *Medicine, University of Nottingham*

12 <sup>3</sup> *School of Life Sciences, Queen's Medical Centre, University of Nottingham;*

13 *[fran.ebling@nottingham.ac.uk](mailto:fran.ebling@nottingham.ac.uk); [jl2033@medschl.cam.ac.uk](mailto:jl2033@medschl.cam.ac.uk)*

14 <sup>4</sup> *School of Biosciences and Veterinary Medicine, University of Camerino, Camerino, MC,*  
15 *Italy; [Irene.lupini@studenti.unicam.it](mailto:Irene.lupini@studenti.unicam.it)*

16 <sup>5</sup> *John van Geest Cancer Research Centre, Nottingham Trent University, Nottingham,*  
17 *NG11 8N; [david.boocock@ntu.ac.uk](mailto:david.boocock@ntu.ac.uk); [amanda.miles@ntu.ac.uk](mailto:amanda.miles@ntu.ac.uk)*

18

19 \* Correspondence: [peter.aldiss@nottingham.ac.uk](mailto:peter.aldiss@nottingham.ac.uk); [michael.symonds@nottingham.ac.uk](mailto:michael.symonds@nottingham.ac.uk)

20

21

22 **Declaration of interests: None**

23

24

25

26

27

28

29

30

31 **Abstract**

32 Therapeutic activation of thermogenic brown adipose tissue (BAT) may be feasible to  
33 prevent, or treat, cardiometabolic disease. However, rodents are commonly housed below  
34 thermoneutrality (~20°C) which can modulate their metabolism and physiology including the  
35 hyperactivation of brown (BAT) and beige white adipose tissue. We housed animals at  
36 thermoneutrality from weaning to chronically suppress BAT, mimic human physiology and  
37 explore the efficacy of chronic, mild cold-exposure and  $\beta$ 3-adrenoreceptor agonism under  
38 these conditions. Using metabolic phenotyping and exploratory proteomics we show that  
39 transfer from 28°C to 20°C drives weight gain and a 125% increase in subcutaneous fat  
40 mass, an effect not seen with YM-178 administration thus suggesting a direct effect of a cool  
41 ambient temperature in promoting weight gain and further adiposity in obese rats. Following  
42 chronic suppression of BAT, uncoupling protein 1 mRNA was undetectable in IWAT in all  
43 groups. Using exploratory adipose tissue proteomics, we reveal novel gene ontology terms  
44 associated with cold-induced weight gain in BAT and IWAT whilst Reactome pathway  
45 analysis highlights the regulation of mitotic (i.e. G2/M transition) and metabolism of amino  
46 acids and derivatives pathways. Conversely, YM-178 had minimal metabolic-related effects  
47 but modified pathways involved in proteolysis (i.e. eukaryotic translation initiation) and RNA  
48 surveillance across both tissues. Taken together these findings are indicative of a novel  
49 mechanism whereby animals increase body weight and fat mass following chronic  
50 suppression of adaptive thermogenesis from weaning. In addition, treatment with a  $\beta$ 3-  
51 adrenoreceptor agonist did not improve metabolic health in obese animals raised at  
52 thermoneutrality.

53

54

55 **Keywords:** brown adipose tissue, thermoneutrality, healthy expansion of adipose tissue,  
56 proteomics

57

58

59

60

61

62

## 63 Introduction

64 Therapeutic activation of thermogenic brown adipose tissue (BAT) may be feasible to  
65 prevent, or treat, cardiometabolic disease [1]. In rodent models of obesity, the activation of  
66 BAT and uncoupling protein (UCP1)-positive beige adipocytes in white adipose tissue (WAT)  
67 by cold exposure and sympathomimetics (i.e.  $\beta$ 3-agonists) can attenuate or reverse obesity,  
68 diabetes and atherosclerosis, thus improving metabolic health [1]. A major factor influencing  
69 these outcomes is that animals are typically housed at temperatures well below their  
70 thermoneutral zone (which for a rodent is c. 28°C) [2]. Under these conditions, not only is  
71 BAT hyperactive, but UCP1+ beige adipocytes are readily seen in the inguinal WAT (IWAT)  
72 depot [3].

73 The 'cold-stressed' animal has been widely studied but much less is known about the  
74 underlying adaptations in adipose tissue of animals maintained at thermoneutrality. Usually,  
75 temperatures as low as 4°C, which represent an 'extreme cold', are used to activate BAT,  
76 with the induction of UCP1 and subsequent thermogenic response primarily seen in  
77 subcutaneous IWAT and other 'beige' depots [3]. Conversely, when animals are housed at  
78 thermoneutrality and then exposed to 20°C, the induction of UCP1 is primarily seen in BAT.  
79 These differences suggest there are two steps to the 'browning' process and emphasise the  
80 need to study rodent metabolism under thermoneutral conditions. Importantly, it was recently  
81 demonstrated that BAT from obese mice, housed chronically at thermoneutrality closely  
82 resembles human BAT [4]. This model of 'physiologically humanised BAT' is now thought to  
83 represent the best choice for studying the physiology of this key metabolic tissue [4]. Here,  
84 we extend this recent work by raising animals at thermoneutrality, on an obesogenic diet  
85 from weaning. Beginning this early is a particularly important consideration given the early  
86 developmental steps which would be occurring in early life [5]. Furthermore, we use rats as  
87 classically, their physiology to external stressors such as diet and the environment is closer,  
88 than mice, to humans [6]. Using this model we have demonstrated UCP1 mRNA is absent in  
89 subcutaneous IWAT (the classical 'beige' depot) and not induced with exercise training [7], a  
90 common response at standard housing temperatures and one which is typically not seen in  
91 humans [8]. We hypothesised that activation of BAT by mild-cold and YM-178, a highly  
92 selective  $\beta$ 3-agonist that was recently been shown to activate BAT in lean and obese  
93 humans, and drive improvements in lipid metabolism, would be negligible under these  
94 conditions [9, 10]. Moreover, perivascular BAT would be more responsive as previously  
95 shown to be the case with exercise training [7]. Finally, we sought to determine how the AT  
96 proteome responds following chronic BAT suppression to better understand the molecular  
97 response to potentially thermogenic stimuli at thermoneutrality.

## 98 Results

99 Four weeks of exposure to 20°C promoted weight gain and increased BAT and  
100 subcutaneous IWAT mass, an effect not seen with a clinically relevant dose of YM-178 (Fig.  
101 1A-E). There was no change in total fat mass (i.e. the total of all dissected depots), gonadal  
102 (GWAT), mesenteric (MWAT), retroperitoneal (RPWAT) or paracardial (PCAT) fat depots, or  
103 in liver or heart mass (Fig. 1C and Supp. Fig 1B-G) suggesting cold does not drive whole  
104 body changes in adiposity, and potentially lean mass. There was however a significant  
105 increase in kidney size (Supp. Fig 1H). As there was no difference in 24h energy  
106 expenditure, or intake, (Supp. Fig. 1I-J) we incorporated these parameters, alongside body  
107 mass, into an ANCOVA. Whilst there was no evidence that changes in body mass were  
108 associated with altered energy expenditure (Fig. 1G) in cold exposed rats there was a  
109 significant, unexpected relationship between body mass and energy intake in this group  
110 ( $r^2=0.852$ ,  $p=0.025$ , Fig. 1H) which was not seen in animals treated with YM-178. (Fig. 1A-  
111 H). Increased weight gain and adiposity in cold-exposed animals was not associated with  
112 impaired metabolic parameters (i.e. serum glucose, triglycerides and NEFA) or hormones  
113 (i.e. insulin and leptin) (Fig. 1I-N) suggesting it is not pathological.

114 Neither cold exposure, nor YM-178 were effective at inducing thermogenic genes (i.e.  
115 UCP1) in BAT or PVAT. in (Fig. 1O-P). Expression of the BAT marker CITED1 and beige  
116 marker TMEM26 were reduced in BAT of both cold exposed and YM-178 treated rats whilst  
117 the beige marker P2RX5 was upregulated in PVAT. Using targeted arrays to screen for  
118 primary genes involved in adipose tissue metabolism we saw an increase in the expression  
119 of FASN mRNA in both BAT and PVAT (Fig.1O-P). There was also an increase of genes  
120 involved in glycolysis (i.e. HK2 and PDK), fatty acid oxidation (i.e. ACACA and ACACB) and  
121 insulin resistance (i.e. AdipoR1 and MAPK9) in PVAT only following cold exposure (Fig. 1R-  
122 W). In contrast, in IWAT, UCP1 mRNA (Fig. 1Q).was absent in all rats and, despite a  
123 c.125% increase in IWAT mass of cold exposed rats, there was no change in the  
124 expression of other genes associated with thermogenesis (i.e.  $ADR\beta3$ ), beige adipocytes  
125 (i.e. TMEM26) or lipogenesis (i.e. FASN).

126 Morphologically, BAT was characterised by a heterogenous mix of small, mitochondria rich  
127 lipid droplets and large lipid droplets, and adipocytes, indicative of large-scale whitening (Fig.  
128 2A). Analysis of lipid droplet area in BAT demonstrated a significant increase in both cold,  
129 and YM-178 treated rats (Fig. 2B). Adipocyte size also increased in IWAT of cold-exposed  
130 rats (Fig. 3A and B). Given the surprising increase in BAT and IWAT mass with cold  
131 exposure, we then carried out exploratory adipose tissue proteomics. This method, which  
132 quantifies the 30-40% most abundant proteins across samples, did not detect UCP1 in BAT

133 which is not unexpected given the chronic suppression of adaptive thermogenesis. We  
134 identified 175 differentially regulated proteins in BAT of cold-exposed rats (Fig. 2C, Table 1  
135 and supp. data) including an increase in the mitochondrial citrate transporter protein  
136 (SLC25a1), glucose-6-phosphate dehydrogenase (G6PD), and the muscle isoforms of  
137 phosphoglycerate mutase (PGAM2) and creatine kinase (CKm).

138 Conversely, 137 proteins were differentially regulated in BAT of YM-178 treated animals  
139 (Fig. 2C, Table 1 and supp. data) with an upregulation of proteins involved in skeletal muscle  
140 physiology including myosin heavy chain 4 (MYH4), the fast-twitch skeletal muscle isoforms  
141 troponin I2 (TNNI2) and calsequestrin 1 (CASQ1) in addition to proteins governing endothelial  
142 adhesion and vascular growth (PECAM1 and FBLN5). These changes occurred alongside a  
143 downregulation of the aldo-keto reductase family member proteins B15 (AKR1B15) and C3  
144 (AKR1C3), mevalonate diphosphate decarboxylase (MVD), trans-2,3-enoyl-CoA  
145 reductase (TECR), acyl-CoA dehydrogenase short/branched chain (ACADSB), phosphate  
146 cytidyltransferase 1, choline, alpha (PCYT1A) and 3-hydroxybutyrate dehydrogenase 1  
147 (BDH1) proteins.

148 We then carried out functional analysis of the BAT proteome. The differentially regulated  
149 proteins in BAT of cold exposed animals enriched GO terms involved '*glucose import*', '*ATP-*  
150 '*dependent helicase activity*' and '*regulation of protein phosphorylation*' whilst there was also  
151 an enrichment of nuclear related GO terms including '*histone deacetylation*', '*nucleosomal*  
152 '*DNA binding*', '*nuclear chromatin*' and the '*nucleosome*' (Table 2 and supp. data).  
153 Conversely, differentially regulated proteins in BAT of animals treated with YM-178 enriched  
154 GO terms including '*positive regulation of protein kinase B signalling*', '*negative regulation of*  
155 '*cellular carbohydrate metabolic process*' and '*positive regulation of atpase activity*' whilst  
156 there was also an enrichment of GO terms involved in both brown adipocyte and muscle  
157 biology including '*brown fat cell differentiation*', '*skeletal muscle contraction*' and '*regulation*  
158 '*of muscle contraction*' (Table 2 and supp. data). Finally, using ReactomePA we show  
159 enriched pathways regulated by cold exposure (Fig. 2D), and their interactions (Fig. 2E),  
160 including '*transcriptional regulation of RUNx1*', pathways involved in mitosis (i.e. G2/M  
161 transition), and the degradation of glycoproteins (i.e. CS/DS degradation). Conversely, YM-  
162 178 treatment enriched multiple pathways associated with proteolysis (i.e. eukaryotic  
163 translation initiation and formation of a pool of free 40S subunits) and RNA surveillance (i.e.  
164 nonsense mediated decay) (Fig. 2F and G).

165 The substantial increase in IWAT of cold-exposed rats was associated with 116 differentially  
166 regulated proteins (Fig. 3C, Table 3 and supp. data) including the upregulation of lipid  
167 metabolic proteins such as fatty acid binding proteins 1 (FABP1) and 3 (FABP3), fatty acid

168 synthase (FASN) and ATP citrate lyase (ACLY) and those involved in beta oxidation  
169 including hydroxynacyl-CoA dehydrogenase (HADH) and acyl-CoA dehydrogenase long  
170 chain (ACADL). In addition, there was an upregulation of glycerol kinase (GK), pyruvate  
171 carboxylase (PC) and monocarboxylic acid transporter 1 (MCT1) that were accompanied by  
172 a downregulation of multiple proteins involved in mRNA processing and splicing (i.e. RNA  
173 binding motif protein 8B, RBM8B; dexd-Box helicase 39B, DDX39B and poly(u) binding  
174 splicing factor 60, PUF60).

175 YM-178 administration modulated 206 proteins in IWAT (Fig. 3C, Table 3 and supp. data)  
176 including an upregulation of multiple proteins involved in the nervous system including  
177 synuclein gamma (SNCG), neurolysin (NLN) and neuronal pas domain protein 4 (NPAS4).  
178 This was associated with an increase in proteins involved in lipid and cholesterol metabolism  
179 including carnitine palmitoyltransferase 1A (CPT1A), hormone-sensitive lipase (LIPE) and  
180 apolipoprotein C1 and M (APOC1 and APOM). Interestingly, YM-178 also induced an  
181 increase in multiple inflammatory proteins, including orosomucoid 1 (ORM1), complement  
182 C4A (C4A), S100 calcium binding protein A8 (S100A8) and S100 calcium binding protein B  
183 (S100B).

184 Differentially regulated proteins in IWAT of cold-exposed rats enriched GO terms involved in  
185 the '*DNA damage response*', '*3-hydroxyacyl-coa dehydrogenase activity*' and '*NAD+ binding*'  
186 whilst YM-178 enriched inflammatory terms including the '*acute phase response*' and  
187 '*structural constituent of ribosome*' suggesting an effect of sympathetic activation on both the  
188 inflammatory system and protein synthesis (Table 4 and supp. data). Finally, ReactomePA  
189 demonstrated enriched pathways (Fig. 3D), and their interactions (Fig. 3E) were associated  
190 with IWAT expansion including the 'metabolism of amino acids and derivatives' and 'fatty  
191 acid metabolism'. Conversely, and similar to BAT, YM-178 treatment enriched multiple  
192 pathways associated with proteolysis (i.e. eukaryotic translation initiation and formation of a  
193 pool of free 40S subunits) and RNA surveillance (i.e. nonsense mediated decay) but to a  
194 larger degree (i.e. 23-27 proteins per term rather than 9-11; Fig. 3F and G).

195

## 196 **Discussion**

197 Housing temperature, especially cold exposure, impacts on metabolic homeostasis as  
198 illustrated by the effects on BAT and 'browning' [3, 11-14]. Little is known as to whether  
199 interventions considered to promote browning are effective in animals maintained at  
200 thermoneutrality [2, 14]. Here we show that chronic exposure to a mild-cold stimulus (i.e.  
201 standard housing temperature) drives weight gain and the deposition of large quantities of

202 subcutaneous adipose tissue in obese rats rather than the activation of BAT and subsequent  
203 weight-loss as expected [1]. This effect is not seen in rats treated with the highly selective  
204  $\beta$ 3-agonist YM-178, suggesting sympathetic activation is not involved and a direct effect of  
205 ambient temperature. Taken together these findings are indicative of a novel mechanism  
206 whereby rats increase body weight and fat mass following chronic suppression of adaptive  
207 thermogenesis from weaning.

208 There is accumulating evidence that, in the absence of adaptive thermogenesis, other  
209 mechanisms compensate in order to maintain body temperature. For instance, in UCP1 k/o  
210 mice, a reduction in BAT thermogenesis leads to a the recruitment of shivering  
211 thermogenesis in skeletal muscle [15]. Conversely, when shivering is impaired in Sarcolipin  
212 k/o mice, there is a compensatory increase in BAT activity [15]. In obese animals lacking  
213 BAT, there seems to be an entirely different homeostatic response to cold stress. Following  
214 BAT lipectomy, obese, cold-exposed rats gain weight and adipose tissue mass is nearly  
215 doubled [16] which mirrors our findings when BAT is chronically suppressed. Furthermore,  
216 intermittent cold-exposure (from 20°C to 4°C) over a period of days promotes weight gain  
217 and adiposity and this is associated with intermittent increases in energy intake [17]. Rats  
218 are also more susceptible to weight gain, and fat accumulation when reared in the cold  
219 (18°C vs. 30°C), an effect which persists when housed at a common temperature [18]. There  
220 is also a plausible mechanism linking the gut to this phenotype which needs to be explored.  
221 Cold exposure drives intestinal growth, increased fatty acid absorption and paracellular  
222 permeability to nutrients [19, 20]. The efficiency of energy utilisation is also sufficient to  
223 maintain core body temperature during acute cold exposure [21]. If the gut can grow, even  
224 during periods of energy restriction, and maximise absorption of energy to a degree that it  
225 sustains critical functions, and ultimately life, then it may be able to drive adiposity in a  
226 similar manner. Whilst the insulative effects of obesity are being debated [22-24] a model  
227 whereby rats, and potentially other rodents, deposit subcutaneous fat during exposure to  
228 cold (i.e. “store up nuts for the winter internally” [18]) would make sense, and be hugely  
229 beneficial from an evolutionary perspective given wild animals cannot simply increase  
230 energy intake during winter months.

231

232 Another important finding of this study is that the increase in weight gain and subcutaneous  
233 AT mass seen in cold-exposed rats was not associated with impaired metabolic parameters  
234 (i.e. fasting glucose and lipids) or any discernible adipose tissue dysfunction. Here, chronic  
235 exposure to a mild cold stimulus seemingly drives a phenotypically healthy expansion of  
236 subcutaneous AT. Using exploratory proteomics, we were able to elucidate processes in

237 both BAT and IWAT associated with this expansion of AT mass. An increase in proteins that  
238 modulate metabolism, including those involved in glycolysis, the TCA cycle and lipogenesis,  
239 suggests that there is an increased metabolic flux in these depots which, ultimately, results  
240 in net lipogenesis. In BAT, this is associated with an enrichment of mitotic pathways (i.e.  
241 G2/M transition). The G2/M transition is a critical point in the cell cycle where, following DNA  
242 replication, the mitotic process begins, and cells separate into replicate daughter cells.  
243 Mitotic clonal expansion is essential for adipogenesis in 3T3-L1 adipocytes [25] and is one of  
244 the postulated mechanisms through which FTO regulates fat mass [26]. Further, enrichment  
245 of the ‘transcriptional regulation on RUNX1’ pathway, which regulates the white-to-  
246 brown/beige transition via CDK6 points towards the cell-cycle as a key mediator of increased  
247 BAT mass following cold-exposure [27]. As such, an increase in mitosis of adipocyte pre-  
248 cursors, key changes in the cell cycle and subsequent adipogenesis may be partly driving  
249 increased BAT mass.

250 In IWAT, an upregulation of regulatory proteins involved in lipid metabolism (i.e. FABP1,  
251 FASN and ACLY) and beta oxidation (i.e. HADH and ACADL) in addition to GK, PC and  
252 MCT1 indicates an increased metabolic flux in IWAT. Importantly, however, adipocyte size in  
253 IWAT of cold-exposed rats only increased by ~17%. As such, we predict that this  
254 physiological expansion of IWAT is largely due to adipogenesis which ties in to the already  
255 established theorem of ‘healthy adipose tissue expansion’ where growth of subcutaneous  
256 AT, through adipogenesis, protects from the adverse effects of an obesogenic diet [28].

257 We were also able to elucidate the impact of sympathetic activation in the absence of any  
258 change in housing temperature by administering YM-178. This highly selective  $\beta$ 3-agonist  
259 increases BAT activity, whole body EE and induces ‘browning’ in humans [29-32]. More  
260 recently, two landmark studies have demonstrated that YM-178 also improves glucose  
261 homeostasis and insulin sensitivity, improves  $\beta$ -cell function, reduces skeletal muscle  
262 triglyceride content and increases HDL cholesterol and adiponectin in overweight and obese  
263 prediabetic or insulin resistant humans [9, 10]. However, these, and other studies show that  
264 human BAT activity and the response to either cold, or other thermogenic stimuli (i.e. YM-  
265 178) is highly heterogenous which is unsurprising given humans undergo seasonal BAT  
266 activation to varying degrees [33]. Our aim was to determine the efficacy of this treatment in  
267 a homogenous population where BAT had been suppressed from early life. Under these  
268 conditions, YM-178 treatment had no impact on metabolic parameters or thermogenesis. It  
269 does, however, effect pathways involved in protein synthesis in both BAT and, to a larger  
270 degree, IWAT. In the hippocampus,  $\beta$ 3-AR agonism (by isoprenaline) drives ERK/MTOR  
271 dependent activation of eukaryotic initiation factor 4E and inhibition of the translation  
272 repressor 4E-BP whilst CL316, 243 and salbutamol drive skeletal muscle hypertrophy and



273 protein synthesis in mice and humans respectively [34-36]. This would suggest a novel role  
274 for YM-178 in regulating protein synthesis in adipose tissues which has yet to be examined  
275 with previous human studies focussing on overactive bladder and associated symptoms [36,  
276 37]. YM-178 also impacted on proteins involved in the acute phase response and  
277 inflammation in both BAT and IWAT. Taken together, this suggests that YM-178 treatment  
278 following chronic suppression of BAT may act negatively on AT driving inflammatory  
279 processes. Whilst these differences may be species specific, they may also highlight  
280 potential effects of YM-178 if given to individuals lacking BAT, or who exhibit low  
281 responsiveness to thermogenic stimuli.

282 Whilst this study points to a novel, unexplained, yet controversial adaptation to cold it is  
283 important to remember the major differences in physiology, and cellular processes in  
284 animals housed at different ambient temperatures [14]. These differences will likely be  
285 exacerbated in animals who have been raised at thermoneutrality from weaning and it is not  
286 entirely unexpected that the physiological response to a commonly studied stimulus would  
287 be different in this scenario. It is clear that the early life environment, and early life stressors,  
288 impact adult physiology and susceptibility to disease, including obesity, and important  
289 adaptations during the developmental period may underlie the adaptations seen here.  
290 Despite aiming to mimic human physiology this work cannot of course recapitulate the  
291 human in-utero, and birth environment and there may be other key developmental changes  
292 in humans during this period that are not applicable here. Further, rearing temperature of  
293 rats is associated with changes to sympathoadrenal activity and rats are susceptible to  
294 obesity in both a strain, and sex-dependent manner [18, 38, 39]. It will be important in future  
295 to determine if this effect is not only species specific, but strain and sex specific as we look  
296 to untangle aspects of this biology to promote healthy expansion of adipose tissue in  
297 humans.

## 298 **Conclusion**

299 In summary, we show that chronic exposure to mild-cold following chronic suppression of  
300 BAT drives weight gain and the deposition of large quantities of subcutaneous AT. Whilst the  
301 precise mechanism is not clear, this work points towards a novel response whereby animals  
302 increase body weight and fat mass in response to a reduction in ambient temperature. We  
303 propose that chronic suppression of BAT from weaning, using thermoneutral housing and an  
304 obesogenic diet, changes the physiological response to cold in the obese state. Instead,  
305 humanised animals deposit adipose tissue and gain weight, an effect not seen with YM-178,  
306 suggesting a direct effect of temperature, where an insulative mechanism is potentially  
307 recruited when a thermogenic response is absent.

## 308 **Methods**

### 309 ***Animals, cold exposure and YM-178 treatment***

310 All studies were approved by the University of Nottingham Animal Welfare and Ethical  
311 Review Board and were carried out in accordance with the UK Animals (Scientific  
312 Procedures) Act of 1986 (PPL no.). Eighteen male Sprague-Dawley rats aged 3 weeks were  
313 obtained from Charles River (Kent, UK) and housed immediately at thermoneutrality  
314 (c.28°C), on a high-fat diet (HFD; 45%, 824018 SDS, Kent, UK), under a 12:12-hour reverse  
315 light-dark cycle (lights off at 08:00). These conditions were chosen so as to closer mimic  
316 human physiology [3], minimise animal stress and maximise data quality and translatability  
317 [40]. At 12 weeks of age, all animals were randomised to 4 weeks of standard housing  
318 temperature (20°C, n=6), YM-178 (28°C+β3, at a clinically relevant dose of 0.75mg/kg/day,  
319 n=6) administration or HFD controls (28°C, n=6). In adherence to the National Centre for the  
320 Replacement, Refinement and Reduction of Animals in Research (NC3Rs), this experiment  
321 was ran alongside our work looking at the effect of exercise training on 'browning' and  
322 utilised the same cohort of control HFD animals [41].

### 323 ***Metabolic assessment and tissue collection***

324 All animals were placed in an open-circuit calorimeter (CLAMS: Columbus Instruments,  
325 Linton Instrumentation, UK) for the final 48h to enable the assessment of whole body  
326 metabolism [42]. All animals were then weighed and fasted overnight prior to euthanasia by  
327 rising CO<sub>2</sub> gradient. BAT, perivascular BAT (PVAT) from the thoracic aorta and IWAT were  
328 then rapidly dissected, weighed, snap-frozen in liquid nitrogen and stored at -80°C for  
329 subsequent analysis.

### 330 **Histology**

331 Adipose tissue histology was performed as previously described [7]. Briefly, BAT and IWAT  
332 were fixed in formalin, embedded in wax using an Excelsior ES processor (Thermo-Fisher)  
333 and stained using haematoxylin and eosin (Sigma-Aldrich). Between 3 and 5 random  
334 sections were then imaged at 10x with an Olympus BX40 microscope and adipocyte size  
335 was quantified using Adiposoft [43].

### 336 **Gene expression analysis**

337 Total RNA was extracted from each fat depot using the RNeasy Plus Micro extraction kit  
338 (Qiagen, West Sussex, UK) using an adapted version of the single step acidified phenol-  
339 chloroform method. RT-qPCR was carried out as previously described using rat-specific  
340 oligonucleotide primers (Sigma) or FAM-MGB Taqman probes [42]. Gene expression was

341 determined using the GeNorm algorithm against two selected reference genes;  
342 *RPL19:RPL13a* in BAT and IWAT (stability value M = 0.163 in BAT and 0.383 in IWAT) and  
343 *RPL19:HPRT1* in PVAT (stability value M = 0.285).

#### 344 ***Serum analysis***

345 Glucose (GAGO-20, Sigma Aldrich, Gillingham, UK), triglycerides (LabAssay Triglyceride,  
346 Wako, Neuss, Germany), non-esterified fatty acids (NEFA-HR(2), Wako, Neuss, Germany),  
347 insulin (80-INSRT-E01, Alpcos, Salem, NH, USA) and leptin (EZRL-83K, Merck, Darmstadt,  
348 Germany) were measured as previously described following manufacturer's instructions [7].

#### 349 ***Adipose tissue proteomics***

350 Protein extraction, clean up and trypsinisation was performed on 50-100 mg of frozen tissue  
351 (n=4/group) was homogenised in 500  $\mu$ L CellLytic MT cell lysis buffer (Sigma, C3228) prior  
352 to removal of lipid and other contaminants using the ReadyPrep 2D cleanup Kit (Biorad,  
353 1632130) [42]. Samples were then subjected to reduction, alkylation and overnight  
354 trypsinisation following which they were dried down at 60°C for 4 h and stored at 80°C  
355 before resuspension in LCMS grade 5% acetonitrile in 0.1% formic acid for subsequent  
356 analysis. Analysis by mass spectrometry was carried out on a SCIEX TripleTOF 6600  
357 instrument [44] with samples analysed in both SWATH (Data Independent Acquisition) and  
358 IDA (Information Dependent Acquisition) modes for quantitation and spectral library  
359 generation respectively. IDA data was searched together using ProteinPilot 5.0.2 to  
360 generate a spectral library and SWATH data was analysed using Sciex OneOmics software  
361 [45] extracted against the locally generated library as described previously [42].

#### 362 ***Statistical analysis***

363 Statistical analysis was performed in GraphPad Prism version 8.0 (GraphPad Software, San  
364 Diego, CA). Data are expressed as Mean $\pm$ SEM with details of specific statistical tests in  
365 figure legends. Despite prior use of the control group to understand the impact of exercise  
366 training only the groups included in this paper were utilised for analyses [7]. Functional  
367 analysis of the proteome was performed using the Advaita Bioinformatic iPathwayGuide  
368 software ([www.advaitabio.com/ipathwayguide.html](http://www.advaitabio.com/ipathwayguide.html)) (fold change  $\pm$  0.5 and confidence score  
369 cut-off of 0.75). Significantly impacted biological processes and molecular functions were  
370 analysed in the context of the Gene Ontology Consortium database (2017-Nov) [46]. The  
371 Elim pruning method, which removes genes mapped to a significant GO term from more  
372 general (higher level) GO terms, was used to overcome the limitation of errors introduced by  
373 considering genes multiple times [47]. Pathway analysis was carried out using the  
374 ReactomePA package on R Studio (version 3.6.2) with a false discovery rate of <0.1.

375

376 **Availability of data and material:** The datasets used and analysed during the current  
377 study are available from the corresponding author on reasonable request.

378 **Authors' contributions:** P.A., H.B. and M.E.S. conceived the study and attained the  
379 funding; P.A. and M.E.S. developed and designed the experiments; P.A, J.E.L, I.L, A.K.M,  
380 I.B, R.C and D. J. B. performed the experiments; P.A., A.K.M. and D.J.B. analyzed the data;  
381 P.A. and M.E.S. wrote the paper which was revised critically by D.J.B., H.B., F.J.P.E, and  
382 J.E.L. for important intellectual content. All authors read and approved the final manuscript.

383 **Funding:** The British Heart Foundation [grant number FS/15/4/31184/].

384

385

386

387

388

389

390

391

392

393

394

395

396

397

398

399

400

401

## 402 References

- 403 1. Chechi, K., W. van Marken Lichtenbelt, and D. Richard, *Brown and beige adipose tissues:*  
404 *phenotype and metabolic potential in mice and men.* J Appl Physiol (1985), 2018. **124**(2): p.  
405 482-496.
- 406 2. Gordon, C.J., *The mouse thermoregulatory system: Its impact on translating biomedical data*  
407 *to humans.* Physiol Behav, 2017. **179**: p. 55-66.
- 408 3. Kalinovich, A.V., et al., *UCP1 in adipose tissues: two steps to full browning.* Biochimie, 2017.  
409 **134**: p. 127-137.
- 410 4. de Jong, J.M.A., et al., *Human brown adipose tissue is phenocopied by classical brown*  
411 *adipose tissue in physiologically humanized mice.* Nature Metabolism, 2019. **1**(8): p. 830-  
412 843.
- 413 5. Symonds, M.E., M. Pope, and H. Budge, *The Ontogeny of Brown Adipose Tissue.* Annu Rev  
414 Nutr, 2015. **35**: p. 295-320.
- 415 6. Iannaccone, P.M. and H.J. Jacob, *Rats! Dis Model Mech*, 2009. **2**(5-6): p. 206-10.
- 416 7. Aldiss, P., et al., *Exercise Training in Obese Rats Does Not Induce Browning at*  
417 *Thermoneutrality and Induces a Muscle-Like Signature in Brown Adipose Tissue.* Frontiers in  
418 Endocrinology, 2020. **11**(97).
- 419 8. Tsiloulis, T., et al., *No evidence of white adipocyte browning after endurance exercise*  
420 *training in obese men.* Int J Obes (Lond), 2018. **42**(4): p. 721-727.
- 421 9. O'Mara, A.E., et al., *Chronic mirabegron treatment increases human brown fat, HDL*  
422 *cholesterol, and insulin sensitivity.* J Clin Invest, 2020.
- 423 10. Finlin, B.S., et al., *The beta3-adrenergic receptor agonist mirabegron improves glucose*  
424 *homeostasis in obese humans.* J Clin Invest, 2020.
- 425 11. Raun, S.H., et al., *Housing temperature influences exercise training adaptations in mice.*  
426 bioRxiv, 2019: p. 651588.
- 427 12. McKie, G.L., et al., *Housing temperature affects the acute and chronic metabolic adaptations*  
428 *to exercise in mice.* J Physiol, 2019.
- 429 13. Clayton, Z.S. and C.E. McCurdy, *Short-term thermoneutral housing alters glucose metabolism*  
430 *and markers of adipose tissue browning in response to a high-fat diet in lean mice.* Am J  
431 Physiol Regul Integr Comp Physiol, 2018. **315**(4): p. R627-R637.
- 432 14. Hylander, B.L. and E.A. Repasky, *Thermoneutrality, Mice, and Cancer: A Heated Opinion.*  
433 Trends Cancer, 2016. **2**(4): p. 166-175.
- 434 15. Rowland, L.A., et al., *Sarcolipin and uncoupling protein 1 play distinct roles in diet-induced*  
435 *thermogenesis and do not compensate for one another.* Obesity (Silver Spring), 2016. **24**(7):  
436 p. 1430-3.
- 437 16. Stern, J.S., et al., *Scapular brown fat removal enhances development of adiposity in cold-*  
438 *exposed obese Zucker rats.* Am J Physiol, 1984. **247**(5 Pt 2): p. R918-26.
- 439 17. Yoo, H.S., et al., *Intermittent cold exposure enhances fat accumulation in mice.* PLoS One,  
440 2014. **9**(5): p. e96432.
- 441 18. Young, J.B. and Y. Shimano, *Effects of rearing temperature on body weight and abdominal*  
442 *fat in male and female rats.* Am J Physiol, 1998. **274**(2): p. R398-405.
- 443 19. Nilaweera, K.N. and J.R. Speakman, *Regulation of intestinal growth in response to variations*  
444 *in energy supply and demand.* Obes Rev, 2018. **19** Suppl 1: p. 61-72.
- 445 20. Price, E.R., et al., *Cold exposure increases intestinal paracellular permeability to nutrients in*  
446 *the mouse.* J Exp Biol, 2013. **216**(Pt 21): p. 4065-70.
- 447 21. Chevalier, C., et al., *Gut Microbiota Orchestrates Energy Homeostasis during Cold.* Cell, 2015.  
448 **163**(6): p. 1360-74.
- 449 22. Fischer, A.W., et al., *No insulating effect of obesity.* Am J Physiol Endocrinol Metab, 2016: p.  
450 aipendo 00093 2016.

- 451 23. Jay, O. and D. Raubenheimer, *Some problems with translating the insulating effect of obesity*  
452 *from mice to men*. Am J Physiol Endocrinol Metab, 2016. **311**(3): p. E638.
- 453 24. Fischer, A.W., et al., *Reply to letter to the editor: at thermoneutrality, neither the lean nor*  
454 *the obese freeze*. Am J Physiol Endocrinol Metab, 2016. **311**(3): p. E639.
- 455 25. Tang, Q.Q., T.C. Otto, and M.D. Lane, *Mitotic clonal expansion: a synchronous process*  
456 *required for adipogenesis*. Proc Natl Acad Sci U S A, 2003. **100**(1): p. 44-9.
- 457 26. Merkestein, M., et al., *FTO influences adipogenesis by regulating mitotic clonal expansion*.  
458 Nat Commun, 2015. **6**: p. 6792.
- 459 27. Hou, X., et al., *CDK6 inhibits white to beige fat transition by suppressing RUNX1*. Nat  
460 Commun, 2018. **9**(1): p. 1023.
- 461 28. Vishvanath, L. and R.K. Gupta, *Contribution of adipogenesis to healthy adipose tissue*  
462 *expansion in obesity*. J Clin Invest, 2019. **129**(10): p. 4022-4031.
- 463 29. Loh, R.K.C., et al., *Acute metabolic and cardiovascular effects of mirabegron in healthy*  
464 *individuals*. Diabetes Obes Metab, 2019. **21**(2): p. 276-284.
- 465 30. Baskin, A.S., et al., *Regulation of Human Adipose Tissue Activation, Gallbladder Size, and Bile*  
466 *Acid Metabolism by a beta3-Adrenergic Receptor Agonist*. Diabetes, 2018. **67**(10): p. 2113-  
467 2125.
- 468 31. Cypess, A.M., et al., *Activation of human brown adipose tissue by a beta3-adrenergic*  
469 *receptor agonist*. Cell Metab, 2015. **21**(1): p. 33-8.
- 470 32. Finlin, B.S., et al., *Human adipose beiging in response to cold and mirabegron*. JCI Insight,  
471 2018. **3**(15).
- 472 33. Au-Yong, I.T., et al., *Brown adipose tissue and seasonal variation in humans*. Diabetes, 2009.  
473 **58**(11): p. 2583-7.
- 474 34. Gelinias, J.N., et al., *ERK and mTOR signaling couple beta-adrenergic receptors to translation*  
475 *initiation machinery to gate induction of protein synthesis-dependent long-term*  
476 *potentiation*. J Biol Chem, 2007. **282**(37): p. 27527-35.
- 477 35. Hostrup, M., et al., *Beta2 -adrenoceptor agonist salbutamol increases protein turnover rates*  
478 *and alters signalling in skeletal muscle after resistance exercise in young men*. J Physiol,  
479 2018. **596**(17): p. 4121-4139.
- 480 36. Puzzo, D., et al., *CL316,243, a beta3-adrenergic receptor agonist, induces muscle*  
481 *hypertrophy and increased strength*. Sci Rep, 2016. **5**: p. 37504.
- 482 37. Emery, P.W., et al., *Chronic effects of beta 2-adrenergic agonists on body composition and*  
483 *protein synthesis in the rat*. Biosci Rep, 1984. **4**(1): p. 83-91.
- 484 38. Young, J.B., J. Weiss, and N. Boufath, *Effects of rearing temperature on sympathoadrenal*  
485 *activity in young adult rats*. Am J Physiol Regul Integr Comp Physiol, 2002. **283**(5): p. R1198-  
486 209.
- 487 39. White, C.L., et al., *Effect of a high or low ambient perinatal temperature on adult obesity in*  
488 *Osborne-Mendel and S5B/Pl rats*. Am J Physiol Regul Integr Comp Physiol, 2005. **288**(5): p.  
489 R1376-84.
- 490 40. Hawkins, P. and H.D.R. Gollidge, *The 9 to 5 Rodent - Time for Change? Scientific and animal*  
491 *welfare implications of circadian and light effects on laboratory mice and rats*. J Neurosci  
492 Methods, 2018. **300**: p. 20-25.
- 493 41. Aldiss, P., et al., *Exercise does not induce browning of WAT at thermoneutrality and induces*  
494 *an oxidative, myogenic signature in BAT*. bioRxiv, 2019: p. 649061.
- 495 42. Aldiss, P., et al., *Interscapular and Perivascular Brown Adipose Tissue Respond Differently to*  
496 *a Short-Term High-Fat Diet*. 2019.
- 497 43. Galarraga, M., et al., *Adiposoft: automated software for the analysis of white adipose tissue*  
498 *cellularity in histological sections*. J Lipid Res, 2012. **53**(12): p. 2791-6.
- 499 44. Mele, L., et al., *A new inhibitor of glucose-6-phosphate dehydrogenase blocks pentose*  
500 *phosphate pathway and suppresses malignant proliferation and metastasis in vivo*. Cell  
501 Death Dis, 2018. **9**(5): p. 572.

- 502 45. Lambert, J.P., et al., *Mapping differential interactomes by affinity purification coupled with*  
503 *data-independent mass spectrometry acquisition*. *Nat Methods*, 2013. **10**(12): p. 1239-45.
- 504 46. Ashburner, M., et al., *Gene ontology: tool for the unification of biology*. *The Gene Ontology*  
505 *Consortium*. *Nat Genet*, 2000. **25**(1): p. 25-9.
- 506 47. Alexa, A., J. Rahnenfuhrer, and T. Lengauer, *Improved scoring of functional groups from gene*  
507 *expression data by decorrelating GO graph structure*. *Bioinformatics*, 2006. **22**(13): p. 1600-  
508 7.

509

510

511

512

513

514

515

516

517

518

519

520

521

522

523

524

525

526

527

528

529

**Table 1.** Full list of differentially regulated proteins in BAT

| <b>GeneID</b>  | <b>Gene name</b> | <b>logfc</b> | <b>adjpv</b> |
|----------------|------------------|--------------|--------------|
| <b>20°C</b>    |                  |              |              |
| 80754          | Rabep2           | 3.69         | 6.35E-05     |
| 114122         | Vcan             | 2.74         | 0.000269     |
| 292073         | Galns            | -2.75        | 0.00027      |
| 64012          | Rad50            | 1.50         | 0.000288     |
| 171139         | Timm9            | -1.94        | 0.00037      |
| 295088         | Gmps             | 0.67         | 0.000396     |
| 81716          | Ggcx             | 1.44         | 0.000639     |
| 25622          | Ptpn11           | -2.47        | 0.000975     |
| 289590         | Ociad1           | -1.41        | 0.000988     |
| 29384          | H2afy            | -1.15        | 0.001077     |
| <b>28°C+B3</b> |                  |              |              |
| 116689         | Ptpn6            | -3.56        | 0.000154     |
| 25650          | Atp1b1           | -1.40        | 0.000303     |
| 59108          | Mb               | 2.71         | 0.000548     |
| 306262         | Btd              | 2.72         | 0.000735     |
| 501167         | Gmppa            | 1.58         | 0.000934     |
| 64528          | Golga2           | 0.98         | 0.001723     |
| 287633         | Lrrc59           | -0.62        | 0.002902     |
| 81726          | Mvd              | -3.82        | 0.004012     |
| 363425         | Cav2             | -2.41        | 0.004547     |
| 114559         | Arhgef7          | -1.54        | 0.005187     |

530

531

532

533

534

535

536

537

538

539

540

541

542

543



**Table 2. Full list of GO terms enriched in BAT**

| gold                      | goName                                                                           | countDE | countAll | pv_elim |
|---------------------------|----------------------------------------------------------------------------------|---------|----------|---------|
| <b>20°C</b>               |                                                                                  |         |          |         |
| <b>Biological Process</b> |                                                                                  |         |          |         |
| GO:0000122                | negative regulation of transcription from RNA polymerase II promoter             | 14      | 40       | 0.008   |
| GO:0003006                | developmental process involved in reproduction                                   | 20      | 68       | 0.0146  |
| GO:0071786                | endoplasmic reticulum tubular network organization                               | 3       | 4        | 0.0209  |
| GO:0019098                | reproductive behavior                                                            | 3       | 4        | 0.0209  |
| GO:0006544                | glycine metabolic process                                                        | 3       | 4        | 0.0209  |
| GO:0016226                | iron-sulfur cluster assembly                                                     | 3       | 4        | 0.0209  |
| GO:0090068                | positive regulation of cell cycle process                                        | 7       | 17       | 0.0231  |
| GO:0046323                | glucose import                                                                   | 6       | 14       | 0.0285  |
| GO:0001932                | regulation of protein phosphorylation                                            | 32      | 129      | 0.0316  |
| GO:0098969                | neurotransmitter receptor transport to postsynaptic membrane                     | 2       | 2        | 0.0333  |
| <b>Molecular Function</b> |                                                                                  |         |          |         |
| GO:0000980                | RNA polymerase II distal enhancer sequence-specific DNA binding                  | 4       | 5        | 0.0046  |
| GO:0030984                | kininogen binding                                                                | 3       | 3        | 0.006   |
| GO:0031492                | nucleosomal DNA binding                                                          | 4       | 6        | 0.0119  |
| GO:0001846                | opsonin binding                                                                  | 3       | 4        | 0.0207  |
| GO:0005212                | structural constituent of eye lens                                               | 3       | 4        | 0.0207  |
| GO:0016634                | oxidoreductase activity, acting on the CH-CH group of donors, oxygen as acceptor | 3       | 4        | 0.0207  |
| GO:0016831                | carboxy-lyase activity                                                           | 5       | 10       | 0.022   |
| GO:0016746                | transferase activity, transferring acyl groups                                   | 9       | 25       | 0.0259  |
| GO:0004616                | phosphogluconate dehydrogenase (decarboxylating) activity                        | 2       | 2        | 0.0331  |
| GO:0008484                | sulfuric ester hydrolase activity                                                | 2       | 2        | 0.0331  |
| <b>Cellular Component</b> |                                                                                  |         |          |         |
| GO:0042582                | azurophil granule                                                                | 4       | 4        | 0.0011  |
| GO:0000790                | nuclear chromatin                                                                | 12      | 27       | 0.0014  |
| GO:0031616                | spindle pole centrosome                                                          | 3       | 4        | 0.0209  |
| GO:0000786                | nucleosome                                                                       | 5       | 10       | 0.0223  |
| GO:0042719                | mitochondrial intermembrane space protein transporter complex                    | 2       | 2        | 0.0333  |
| GO:0001740                | Barr body                                                                        | 2       | 2        | 0.0333  |
| GO:0072687                | meiotic spindle                                                                  | 2       | 2        | 0.0333  |
| GO:0034751                | aryl hydrocarbon receptor complex                                                | 2       | 2        | 0.0333  |
| GO:0043196                | varicosity                                                                       | 2       | 2        | 0.0333  |
| GO:0001931                | uropod                                                                           | 3       | 5        | 0.0453  |

**28°C+B3**

**Biological Process**

|            |                                                                |    |    |        |
|------------|----------------------------------------------------------------|----|----|--------|
| GO:0003009 | skeletal muscle contraction                                    | 5  | 7  | 0.0015 |
| GO:0051897 | positive regulation of protein kinase B signaling              | 6  | 11 | 0.0034 |
| GO:0010677 | negative regulation of cellular carbohydrate metabolic process | 3  | 3  | 0.0039 |
| GO:1901896 | positive regulation of calcium-transporting ATPase activity    | 3  | 3  | 0.0039 |
| GO:0032781 | positive regulation of ATPase activity                         | 9  | 15 | 0.0055 |
| GO:0050873 | brown fat cell differentiation                                 | 3  | 4  | 0.0138 |
| GO:0006937 | regulation of muscle contraction                               | 8  | 22 | 0.0147 |
| GO:0071560 | cellular response to transforming growth factor beta stimulus  | 8  | 22 | 0.0147 |
| GO:0060048 | cardiac muscle contraction                                     | 6  | 15 | 0.0209 |
| GO:0048193 | Golgi vesicle transport                                        | 12 | 42 | 0.024  |

**Molecular Function**

|            |                                           |    |    |       |
|------------|-------------------------------------------|----|----|-------|
| GO:0035259 | glucocorticoid receptor binding           | 3  | 4  | 0.013 |
| GO:0001671 | ATPase activator activity                 | 3  | 4  | 0.013 |
| GO:0008134 | transcription factor binding              | 15 | 55 | 0.016 |
| GO:0050431 | transforming growth factor beta binding   | 2  | 2  | 0.024 |
| GO:0031730 | CCR5 chemokine receptor binding           | 2  | 2  | 0.024 |
| GO:0031014 | troponin T binding                        | 2  | 2  | 0.024 |
| GO:0005044 | scavenger receptor activity               | 3  | 5  | 0.029 |
| GO:0019905 | syntaxin binding                          | 4  | 9  | 0.037 |
| GO:0016779 | nucleotidyltransferase activity           | 4  | 9  | 0.037 |
| GO:0004888 | transmembrane signaling receptor activity | 4  | 9  | 0.037 |

**Cellular Component**

|            |                                            |    |    |        |
|------------|--------------------------------------------|----|----|--------|
| GO:0005887 | integral component of plasma membrane      | 12 | 32 | 0.002  |
| GO:0030134 | COPII-coated ER to Golgi transport vesicle | 5  | 9  | 0.0067 |
| GO:0005861 | troponin complex                           | 2  | 2  | 0.0245 |
| GO:0001741 | XY body                                    | 2  | 2  | 0.0245 |
| GO:0043596 | nuclear replication fork                   | 3  | 5  | 0.0299 |
| GO:0044295 | axonal growth cone                         | 3  | 5  | 0.0299 |
| GO:0016459 | myosin complex                             | 5  | 13 | 0.0399 |

544

545

546

547

548

549

**Table 3.** Full list of differentially regulated proteins in WAT

| <b>GeneID</b>  | <b>Gene name</b> | <b>logfc</b> | <b>adjpv</b> |
|----------------|------------------|--------------|--------------|
| <b>20°C</b>    |                  |              |              |
| 117028         | Bin1             | -2.79        | 8.97E-06     |
| 304290         | Kdelr2           | -2.68        | 4.47E-05     |
| 24667          | Ppm1b            | -2.65        | 0.000108     |
| 84114          | Agps             | -1.35        | 0.000125     |
| 84401          | Puf60            | -2.94        | 0.000753     |
| 300983         | Abhd14b          | 0.94         | 0.000791     |
| 29218          | Rcn2             | -2.40        | 0.000854     |
| 290028         | Osgep            | -0.94        | 0.002064     |
| 24230          | Tspo             | -2.34        | 0.00248      |
| 171452         | Rab3il1          | -2.15        | 0.00629      |
| <b>28°C+B3</b> |                  |              |              |
| 83730          | Vamp8            | -3.75        | 6.93E-05     |
| 29521          | Scamp1           | 1.51         | 0.000111     |
| 25116          | Hsd11b1          | 0.92         | 0.000382     |
| 117045         | Eif4e            | -0.69        | 0.000942     |
| 25342          | Oxtr             | 1.79         | 0.001104     |
| 298566         | C1qa             | 0.85         | 0.001124     |
| 445268         | Ufc1             | -0.65        | 0.001133     |
| 78947          | Gcs1             | 0.61         | 0.00204      |
| 266734         | Npas4            | 0.87         | 0.004234     |
| 246303         | Serbp1           | 0.78         | 0.004516     |

550

551

552

553

554

555

556

557

558

559

560

561

562

563

564

**Table 4. Full list of GO terms enriched in WAT**

| gold                      | goName                                                         | countDE | countAll | pv_elim |
|---------------------------|----------------------------------------------------------------|---------|----------|---------|
| <b>20°C</b>               |                                                                |         |          |         |
| <b>Biological Process</b> |                                                                |         |          |         |
| GO:0030330                | DNA damage response, signal transduction by p53 class mediator | 5       | 6        | 0.0022  |
| GO:0048711                | positive regulation of astrocyte differentiation               | 3       | 3        | 0.0023  |
| GO:0071498                | cellular response to fluid shear stress                        | 3       | 3        | 0.0023  |
| GO:0032780                | negative regulation of ATPase activity                         | 3       | 3        | 0.0023  |
| GO:0051607                | defense response to virus                                      | 5       | 9        | 0.003   |
| GO:0001822                | kidney development                                             | 11      | 35       | 0.0036  |
| GO:0050731                | positive regulation of peptidyl-tyrosine phosphorylation       | 7       | 17       | 0.0037  |
| GO:0002244                | hematopoietic progenitor cell differentiation                  | 3       | 4        | 0.0081  |
| GO:0045577                | regulation of B cell differentiation                           | 3       | 4        | 0.0081  |
| GO:0042130                | negative regulation of T cell proliferation                    | 3       | 4        | 0.0081  |
| <b>Molecular Function</b> |                                                                |         |          |         |
| GO:0051287                | NAD binding                                                    | 11      | 31       | 0.0013  |
| GO:0008144                | drug binding                                                   | 9       | 29       | 0.0101  |
| GO:0005001                | transmembrane receptor protein tyrosine phosphatase activity   | 2       | 2        | 0.0178  |
| GO:0005521                | lamin binding                                                  | 3       | 5        | 0.0191  |
| GO:0042393                | histone binding                                                | 5       | 13       | 0.021   |
| GO:0033613                | activating transcription factor binding                        | 3       | 6        | 0.0345  |
| GO:0003857                | 3-hydroxyacyl-CoA dehydrogenase activity                       | 3       | 6        | 0.0345  |
| GO:0045296                | cadherin binding                                               | 22      | 113      | 0.0365  |
| GO:0004028                | 3-chloroallyl aldehyde dehydrogenase activity                  | 2       | 3        | 0.0486  |
| GO:0071933                | Arp2/3 complex binding                                         | 2       | 3        | 0.0486  |
| <b>Cellular Component</b> |                                                                |         |          |         |
| GO:0005884                | actin filament                                                 | 9       | 24       | 0.0021  |
| GO:0032993                | protein-DNA complex                                            | 5       | 11       | 0.0088  |
| GO:0002102                | podosome                                                       | 7       | 14       | 0.013   |
| GO:0016607                | nuclear speck                                                  | 8       | 26       | 0.0146  |
| GO:0031209                | SCAR complex                                                   | 2       | 2        | 0.0172  |
| GO:0042611                | MHC protein complex                                            | 2       | 2        | 0.0172  |
| GO:0005687                | U4 snRNP                                                       | 2       | 2        | 0.0172  |
| GO:0005856                | cytoskeleton                                                   | 49      | 238      | 0.0284  |
| GO:0030054                | cell junction                                                  | 41      | 216      | 0.0291  |
| GO:0005681                | spliceosomal complex                                           | 9       | 22       | 0.0311  |

**28°C+B3**

**Biological Process**

|            |                                                          |    |     |        |
|------------|----------------------------------------------------------|----|-----|--------|
| GO:0006953 | acute-phase response                                     | 7  | 12  | 0.0035 |
| GO:0000381 | regulation of alternative mRNA splicing, via spliceosome | 7  | 12  | 0.0035 |
| GO:0034113 | heterotypic cell-cell adhesion                           | 8  | 12  | 0.0061 |
| GO:0070528 | protein kinase C signaling                               | 4  | 5   | 0.0063 |
| GO:0015671 | oxygen transport                                         | 4  | 5   | 0.0063 |
| GO:1901741 | positive regulation of myoblast fusion                   | 3  | 3   | 0.0077 |
| GO:0070934 | CRD-mediated mRNA stabilization                          | 3  | 3   | 0.0077 |
| GO:0007566 | embryo implantation                                      | 6  | 12  | 0.0179 |
| GO:0040007 | growth                                                   | 29 | 103 | 0.0209 |
| GO:0071345 | cellular response to cytokine stimulus                   | 25 | 86  | 0.0211 |

**Molecular Function**

|            |                                    |    |     |         |
|------------|------------------------------------|----|-----|---------|
| GO:0003735 | structural constituent of ribosome | 24 | 62  | 0.00037 |
| GO:0005344 | oxygen carrier activity            | 4  | 5   | 0.00657 |
| GO:0003730 | mRNA 3'-UTR binding                | 8  | 18  | 0.01548 |
| GO:0003682 | chromatin binding                  | 10 | 25  | 0.01623 |
| GO:0140097 | catalytic activity, acting on DNA  | 5  | 9   | 0.01908 |
| GO:0042162 | telomeric DNA binding              | 3  | 4   | 0.02688 |
| GO:0045294 | alpha-catenin binding              | 3  | 4   | 0.02688 |
| GO:0004527 | exonuclease activity               | 3  | 4   | 0.02688 |
| GO:0003723 | RNA binding                        | 73 | 281 | 0.02734 |
| GO:0019825 | oxygen binding                     | 4  | 7   | 0.03278 |

**Cellular Component**

|            |                                   |    |    |         |
|------------|-----------------------------------|----|----|---------|
| GO:0022625 | cytosolic large ribosomal subunit | 15 | 30 | 0.00018 |
| GO:0016323 | basolateral plasma membrane       | 14 | 32 | 0.00164 |
| GO:0005833 | hemoglobin complex                | 3  | 3  | 0.00782 |
| GO:0005903 | brush border                      | 10 | 23 | 0.00812 |
| GO:0030864 | cortical actin cytoskeleton       | 9  | 20 | 0.00918 |
| GO:0016327 | apicolateral plasma membrane      | 3  | 4  | 0.02666 |
| GO:0044451 | nucleoplasm part                  | 18 | 58 | 0.0269  |
| GO:0005637 | nuclear inner membrane            | 5  | 10 | 0.03167 |
| GO:0035770 | ribonucleoprotein granule         | 11 | 32 | 0.03804 |
| GO:0097225 | sperm midpiece                    | 2  | 2  | 0.03953 |

565

566

567

568

569

570 **Figure legends**

571 **Figure 1.** Cold exposure (20°C) but not YM-178 (28°C+β3) drove weight gain and deposition  
572 of BAT and inguinal white adipose tissue (IWAT) with no effect on serum metabolites or  
573 thermogenic markers. (A) Final body weight, (B) 4 week intervention weight gain, (C) total fat  
574 mass, (D) BAT mass, (E) IWAT mass, (F) 24h ambulatory activity, (G) 24h energy  
575 expenditure, (H) 24h energy intake, (I-N) serum hormones and metabolites. (O-Q) Markers  
576 of brown and beige adipose tissue in BAT, PVAT and IWAT, (R-W) select metabolic genes  
577 in BAT and PVAT. Data expressed as mean ± SEM, n=4-5 per group. For comparison, data  
578 was analysed by either one (A-E, H-Q), two-way ANOVA (F, R-W) or ANCOVA (G and H)  
579 with Sidak post-hoc tests. Significance denoted as \* <0.05; \*\* <0.01 or \*\*\* <0.001.

580

581 **Figure 2.** Histological and proteomics analysis of BAT following cold-exposure (20°C) and  
582 YM-178 treatment (28°C+β3). (A-B) Histological analysis of BAT and lipid droplet area. (C)  
583 Venn diagram of differentially regulated proteins. Reactome pathway analysis detailing  
584 enriched pathways and interrelated networks in cold exposed (20°C, D-E) and YM-178  
585 treated animals (28°C+β3, F-G). Data expressed as mean ± SEM, n=4-5 per group.  
586 Adipocyte/lipid droplet area quantified using Adiposoft (28°C, n=8949; 20°C, 15512 and  
587 28°C+β3, 12446). For comparison, data was analysed by one-way ANOVA (B) or using the  
588 ReactomePA package (D-G). Significance denoted as \*\*\*\* <0.0001.

589

590 **Figure 3.** Histological and proteomics analysis of WAT following cold-exposure (20°C) and  
591 YM-178 treatment (28°C+β3). (A-B) Histological analysis of BAT and lipid droplet area. (C)  
592 Venn diagram of differentially regulated proteins. Reactome pathway analysis detailing  
593 enriched pathways and interrelated networks in cold exposed (20°C, D-E) and YM-178  
594 treated animals (28°C+β3, F-G). Data expressed as mean ± SEM, n=4-5 per group.  
595 Adipocyte/lipid droplet area quantified using Adiposoft (28°C, n=750; 20°C, 553 and  
596 28°C+β3, 527). For comparison, data was analysed by one-way ANOVA (B) or using the  
597 ReactomePA package (D-G). Significance denoted as \*\* <0.01.

598

599 **Supplementary Figure 1.** Weight gain trajectory, adipose tissue depot and organ weights.  
600 (A) Body weight gain trajectory from weaning and (B) gonadal, (C) mesenteric, (D)  
601 retroperitoneal, (E) paracardial adipose tissues. (F) liver, (G) heart and (H) kidney mass. (I-J)  
602 absolute energy expenditure and energy intake.

**FIGURE 1**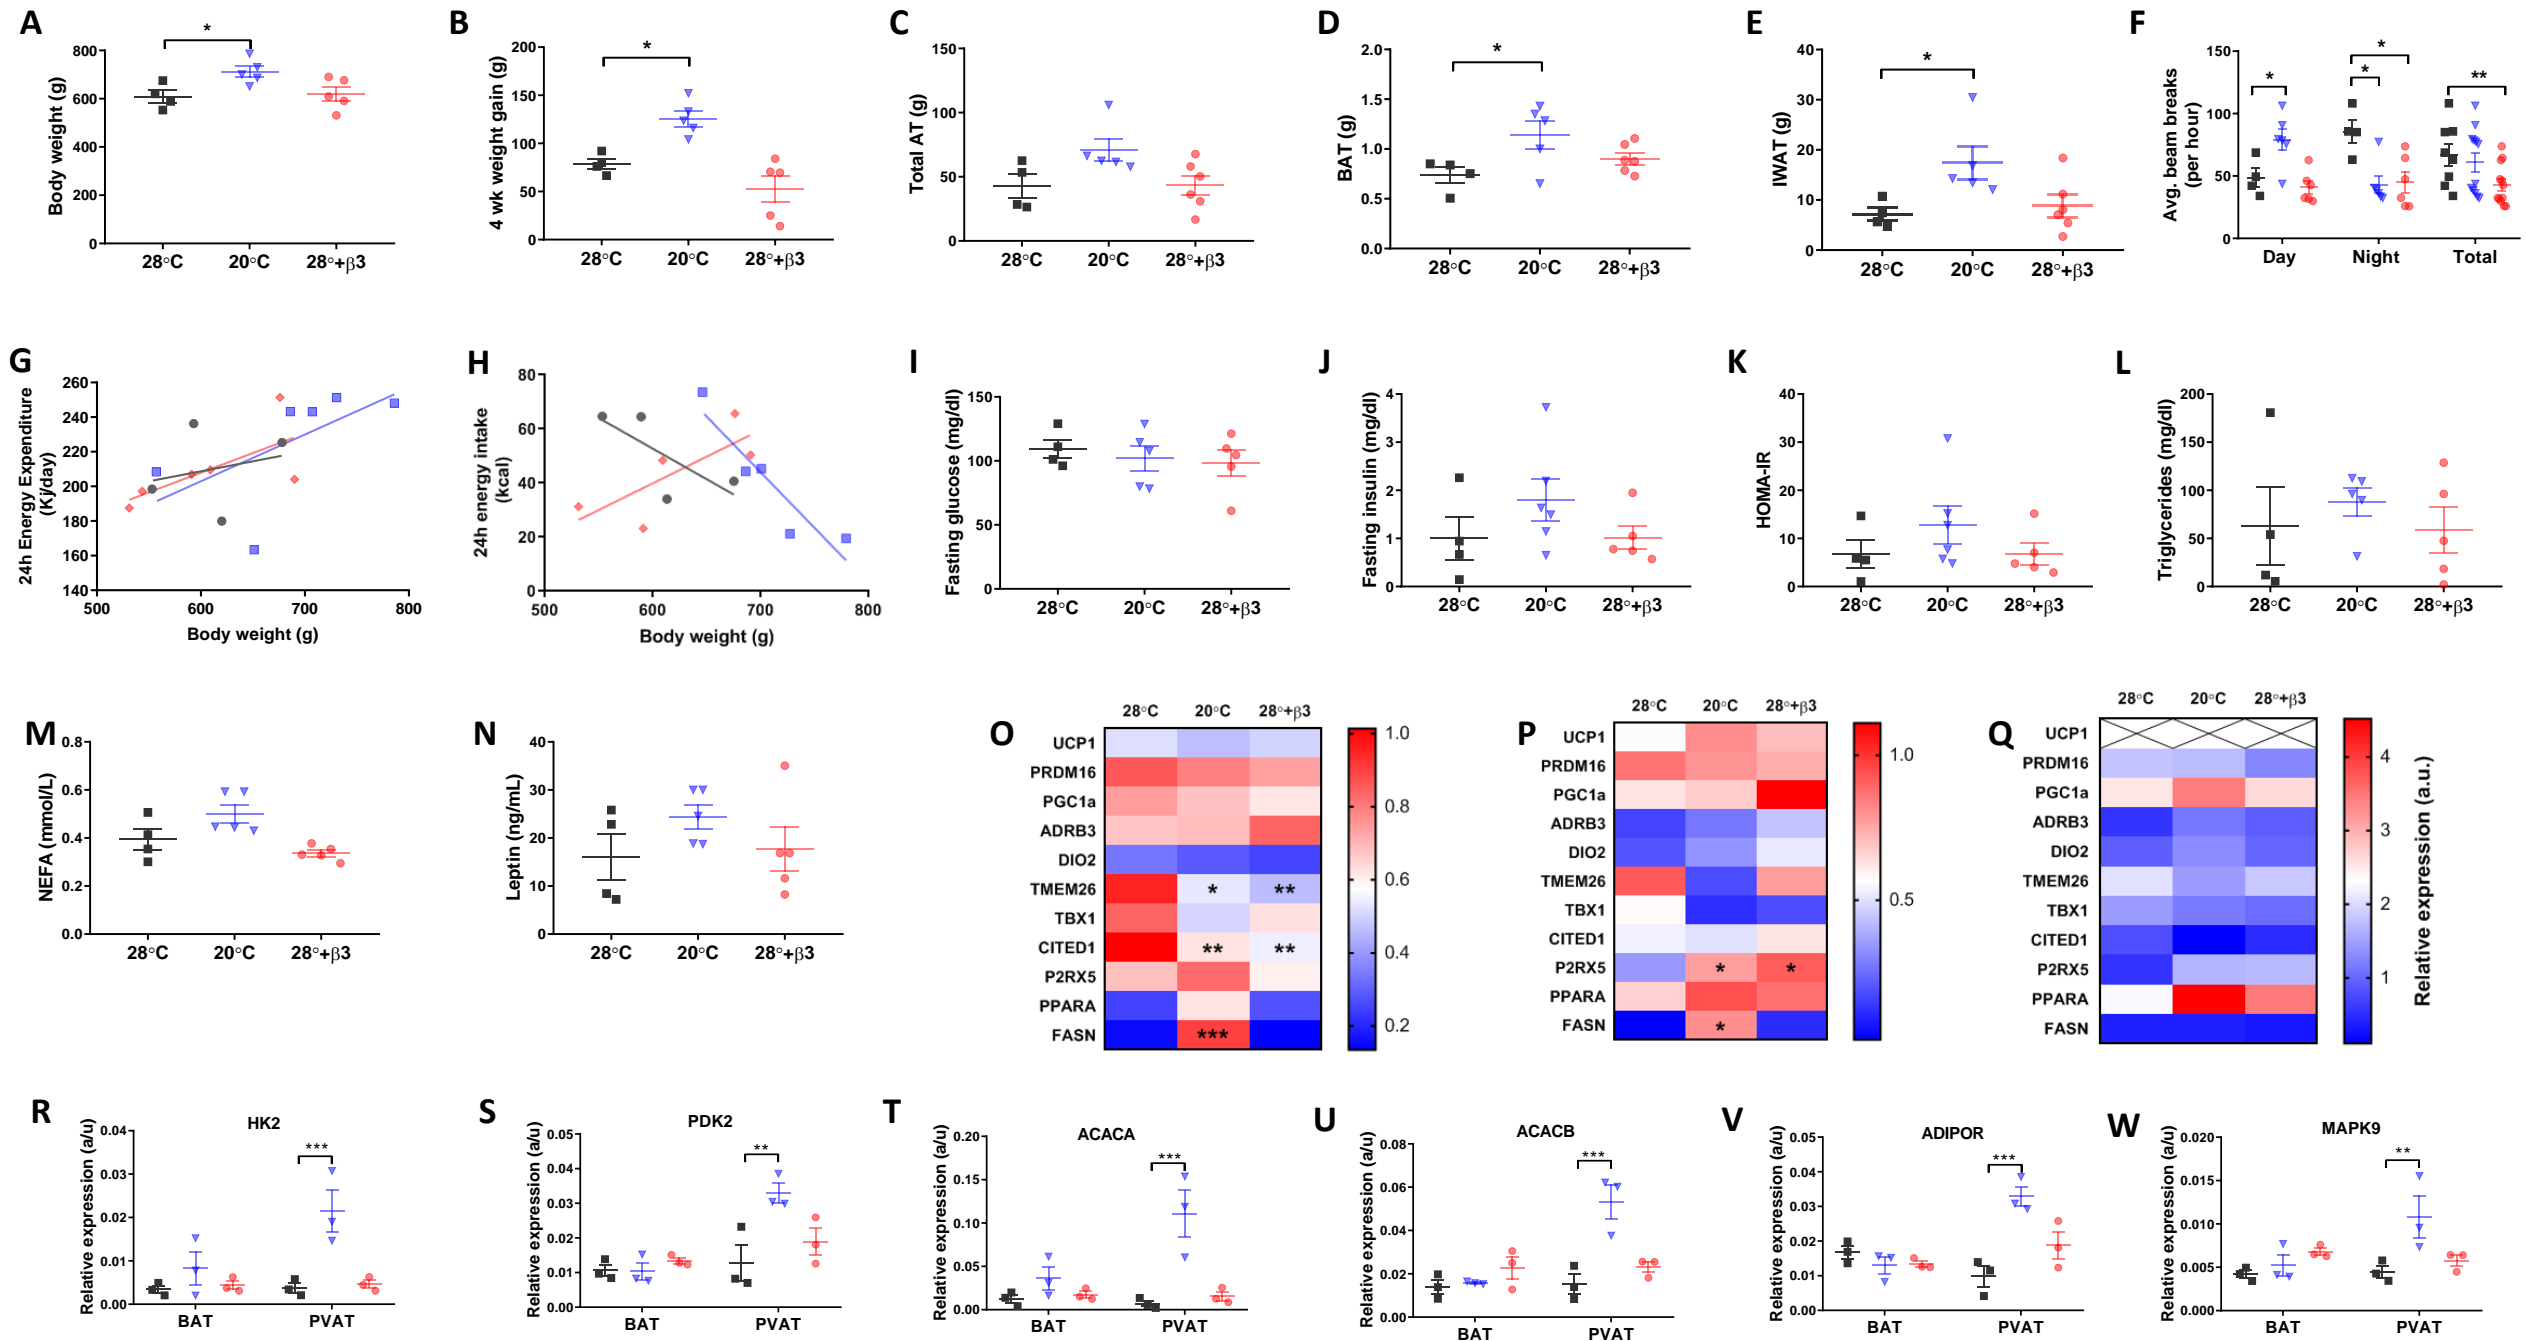

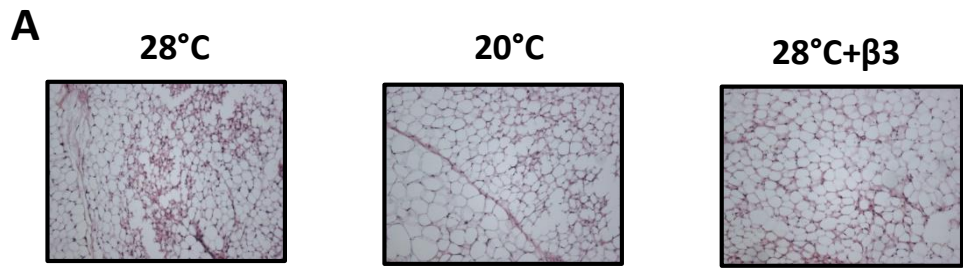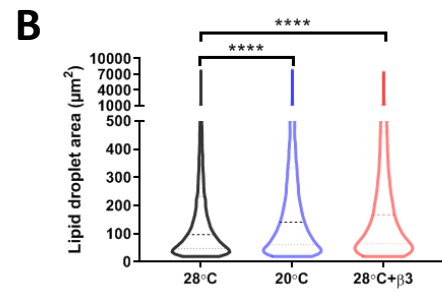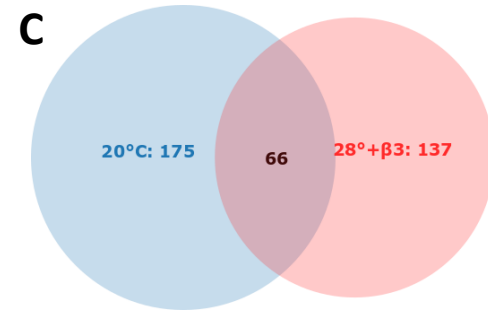

## Reactome pathway and network analysis in BAT following cold-exposure

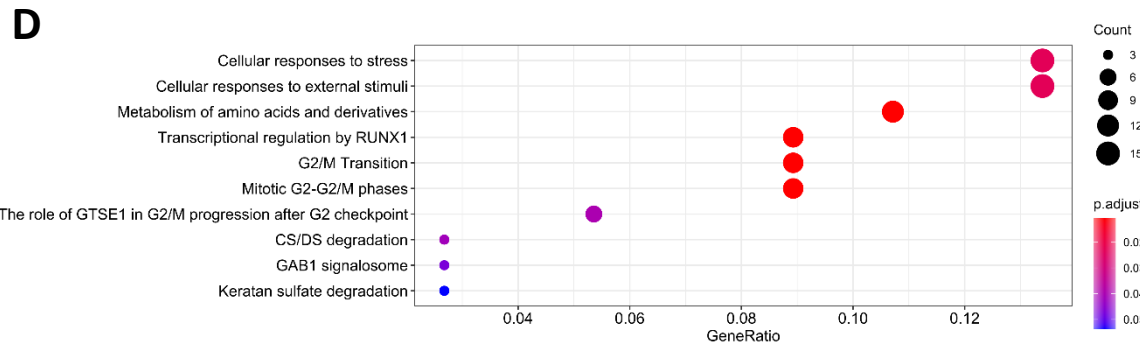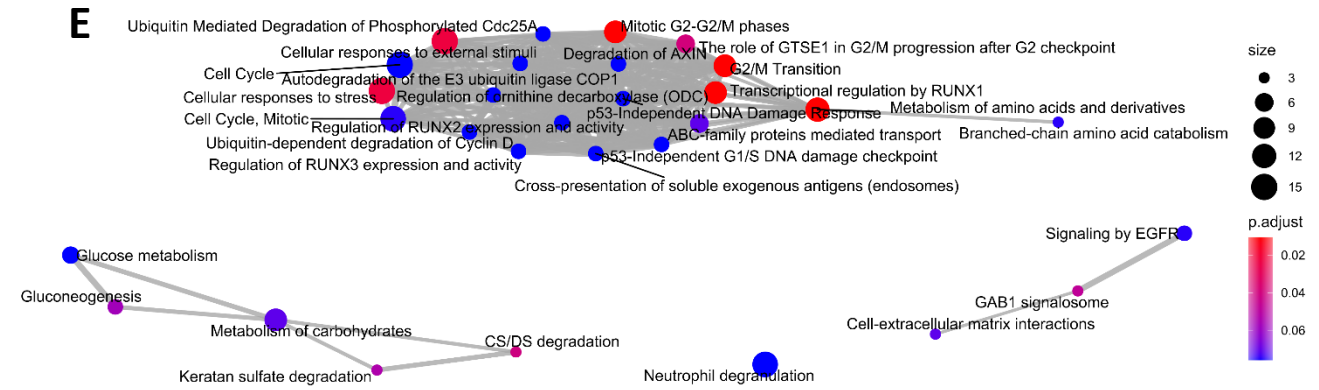

## Reactome pathway and network analysis in BAT following Mirabegron

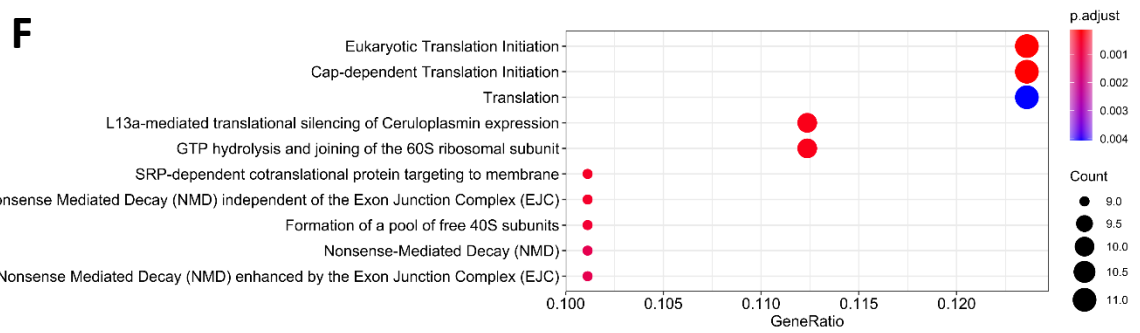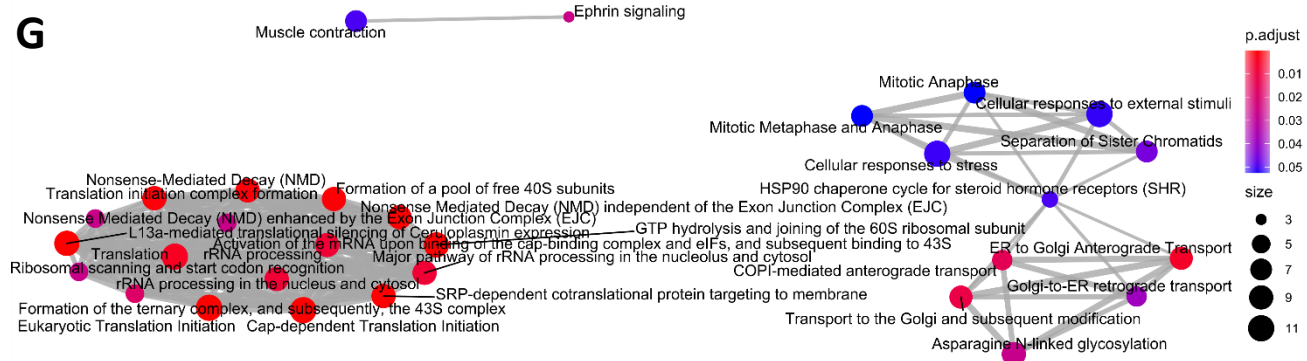



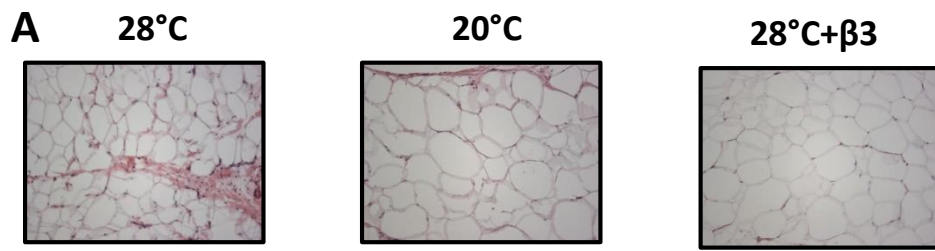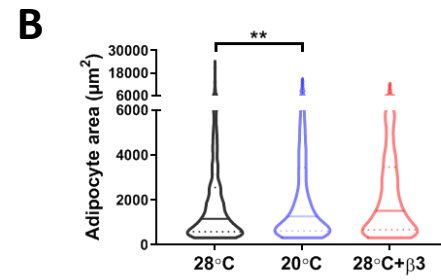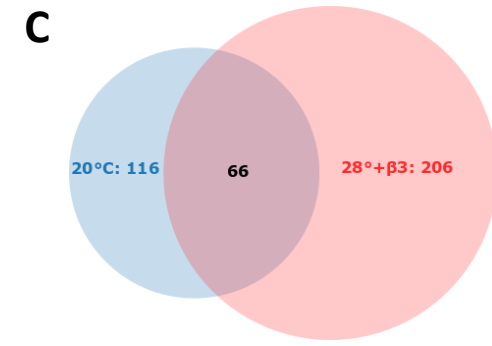

### Reactome pathway and network analysis in WAT following cold-exposure

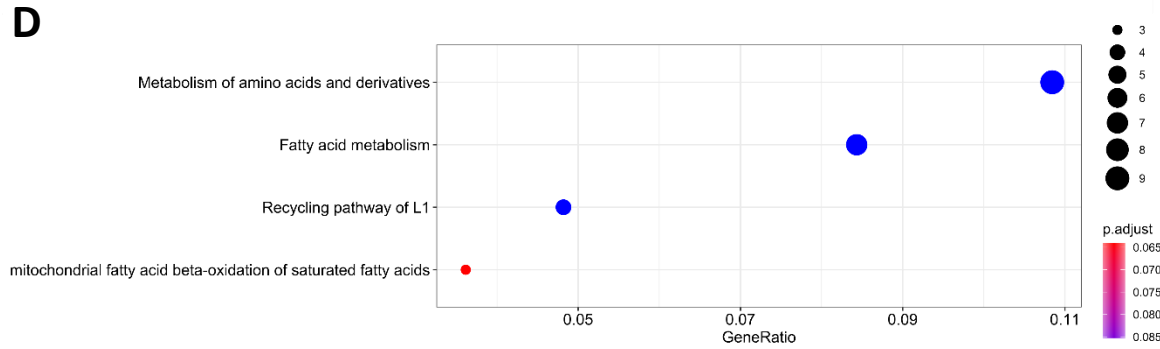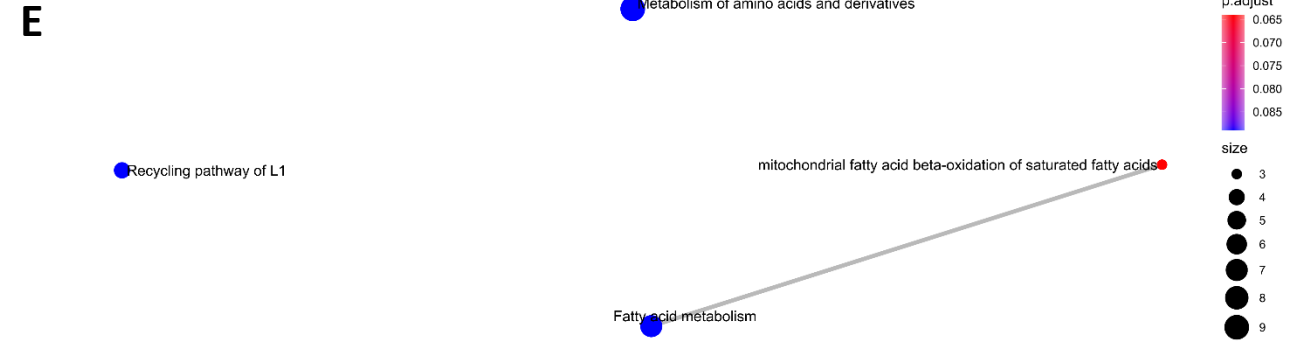

### Reactome pathway and network analysis in WAT following Mirabegron

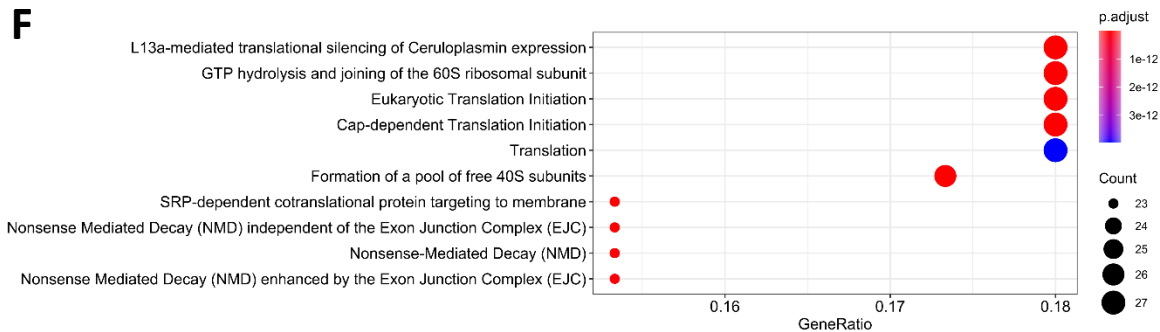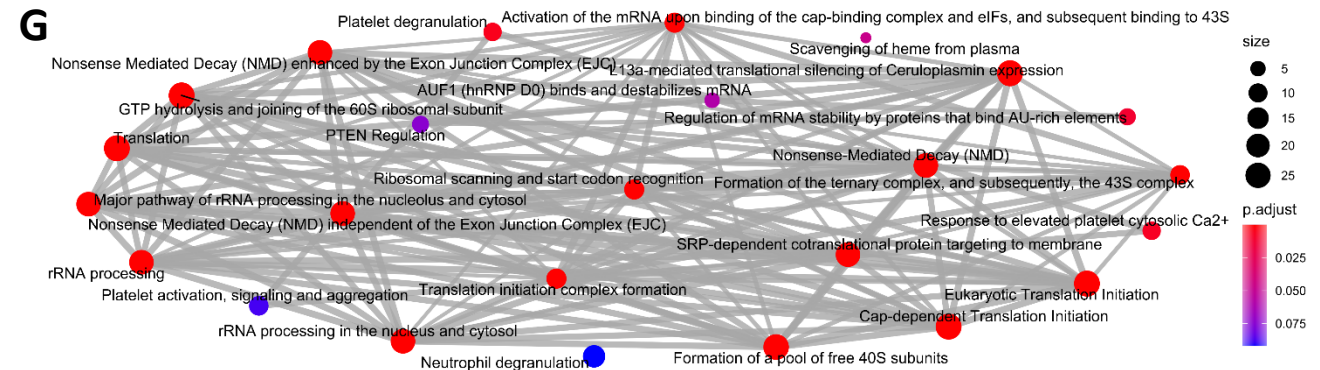

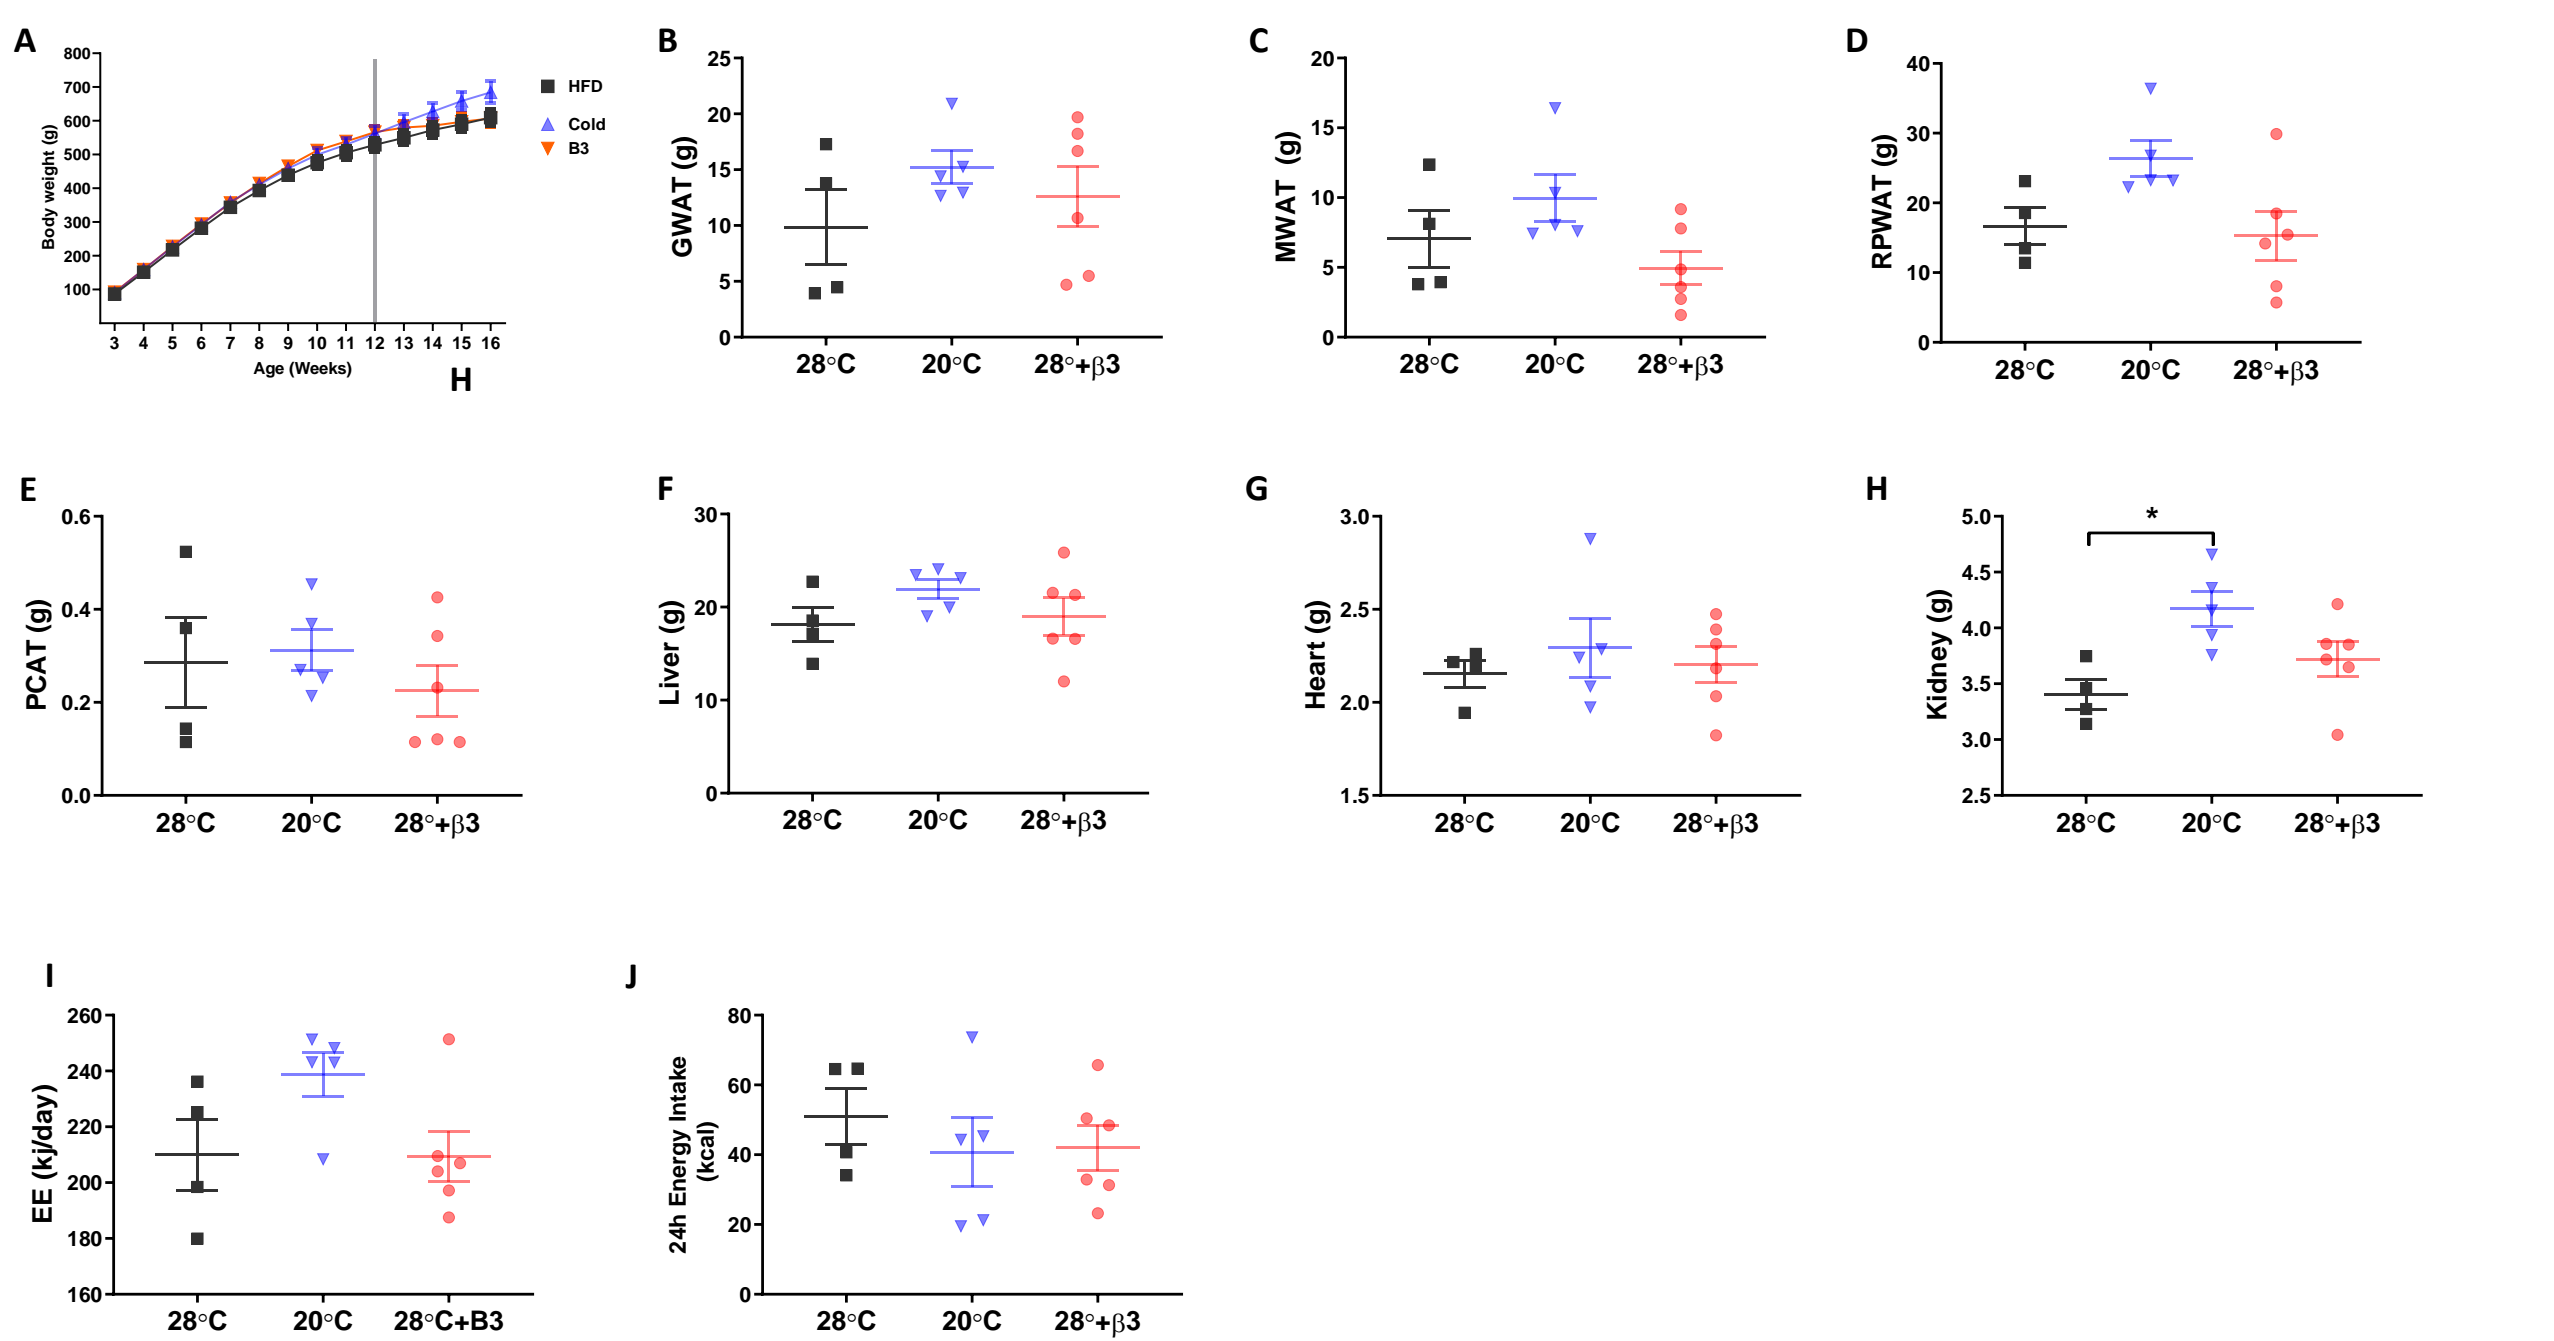

Source: https://www.biorxiv.org/content/10.1101/789289v2.full.pdf
